# Supplementary material for: Innovation in animal model of Pyogenic Spondylitis induced by Staphylococcus aureus
Source: Research Square preprint supplement (doi:10.21203/rs.3.rs-7448639/v1), 2025-09-12
Supplement: Supplementary file 1 [file d0ea4c2d25103e89af0cc70f.docx]

***Supplementary Material***


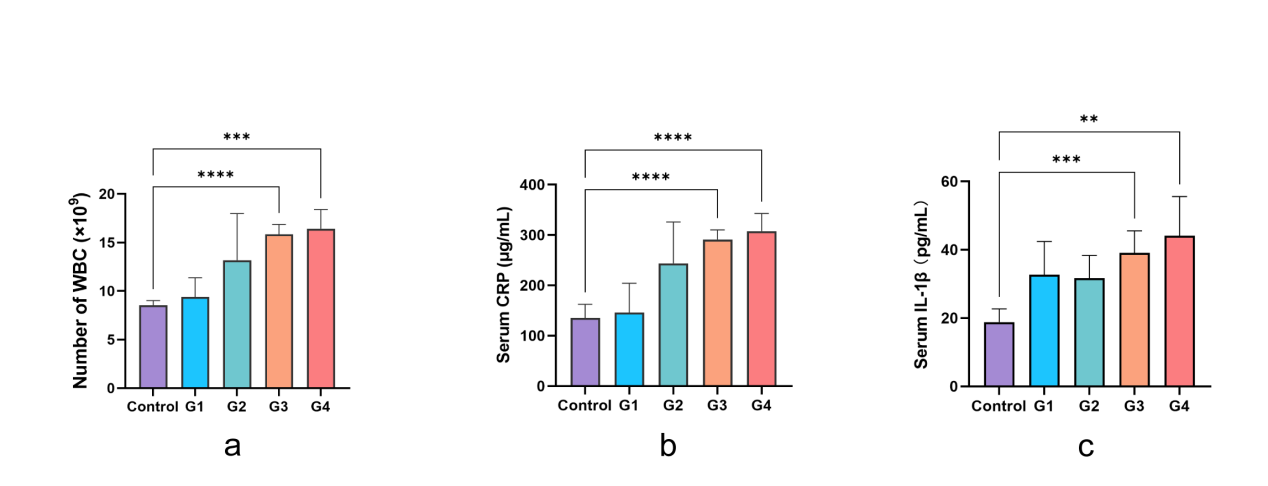


Supplementary Figure 1. Haematological evidence of pyogenic infections.

(a-c) White blood cell (WBC), C-reactive protein, and serum interleukin-1β (IL-1β) values in different groups of rats two weeks after surgery.  **P < 0.01, ***P < 0.001, ****P < 0.0001.

Supplementary Figure 2. Imaging scores between different groups. Data are presented as mean ± SD. ns-no significance, ****P < 0.0001.

Supplementary Figure 3.  Histological scores of vertebrae in different groups. **P < 0.01, ****P < 0.0001.


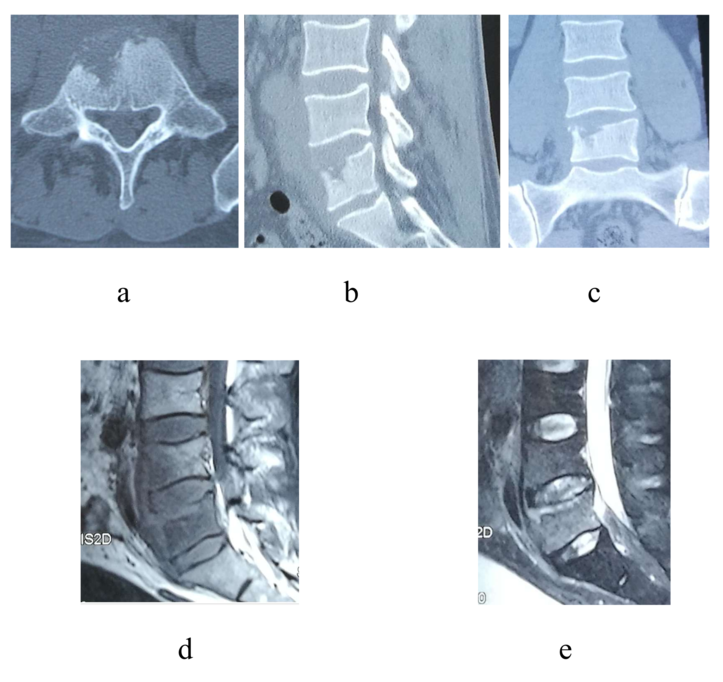


Supplementary Figure 4.  (a,b,c) Obvious bone destruction on computed tomography images.(d,e) Inflammatory infiltration and intervertebral abscess on magnetic resonance imaging.
